# Supplementary material
Source: Research Square preprint supplement (doi:10.21203/rs.3.rs-8668214/v1)
Supplement: Supplementary file 1 [file c6c1763a653b0918b85fd331.docx]

Supplementary Information

###
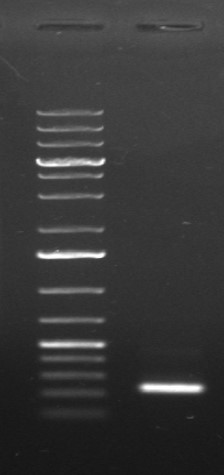


*Figure S1. Full uncropped gel image corresponding to Figure 3A, showing amplification of the 238 bp 3′UTR fragment. The image is presented as obtained directly from the gel documentation system.*


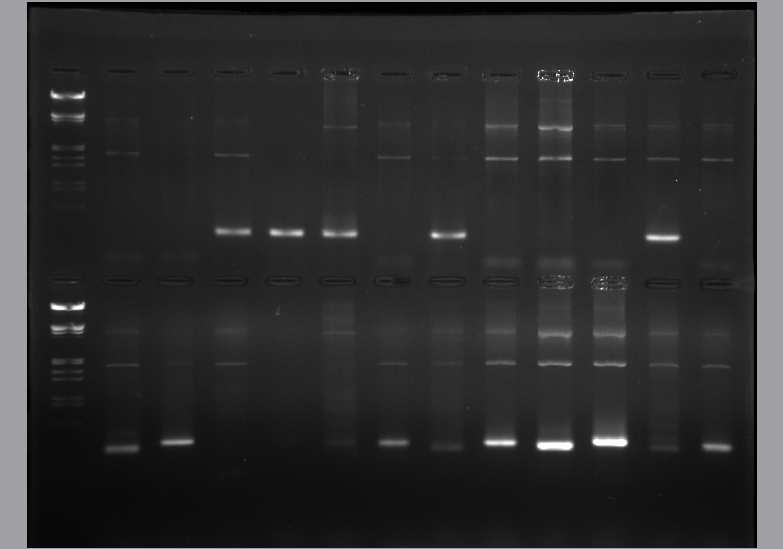


*Figure S2. Full uncropped gel image corresponding to Figure 3B, confirming amplification of the 238 bp 3′UTR fragment in all samples. The image is shown in its original, unmodified form.*
